# Supplementary material for: Emotion classification using advanced neural networks on sentence-level data
Source: PeerJ journal article supplement (doi:10.7717/peerj-cs.3411), 2025-12-09
Supplement: README.docx [file README.docx]

**README - Emotion Classification Using Neural Networks**

**1. Project Description**

This project aims to perform **emotion classification** using advanced neural networks, including **BiLSTM, BiGRU, and BERT**. The models are trained on a large dataset containing **422,746 labeled text samples** across six emotion categories: **Joy, Sadness, Anger, Surprise, Fear, and Disgust**.

**2. System Requirements**

**a) Hardware Requirements:**

- **RAM**: Minimum 8GB (16GB+ recommended)
- **GPU**: Recommended NVIDIA GPU with CUDA support for training acceleration
- **Storage**: At least 10GB of free space

**b) Software Requirements:**

- **OS**: Windows / macOS / Linux
- **Python**: Version 3.8 or later
- **Required Libraries**:
  - TensorFlow / PyTorch
  - Transformers (Hugging Face)
  - NumPy
  - Pandas
  - Scikit-learn
  - Matplotlib

**3. Dataset and Code Access**

The dataset and code used in this project can be accessed through the following link:

🔗 [***https://doi.org/10.5281/zenodo.15009245***](https://doi.org/10.5281/zenodo.15009245)

Please download the necessary files before proceeding with training and evaluation.

**4. Installation of Dependencies**

Before running the project, ensure all dependencies are installed. Use the following command:

pip install -r requirements.txt

If the requirements.txt file is not available, manually install the required libraries using:

pip install torch tensorflow transformers numpy pandas scikit-learn matplotlib

**5. Running the Model**

Once the installation is complete, run the Jupyter notebook to train and evaluate the model:

jupyter notebook biLSTM.ipynb

Alternatively, you can run the script directly in the terminal:

python train_model.py

**Note:** If you are using a GPU, ensure TensorFlow or PyTorch is configured with CUDA.

**6. Project Directory Structure**

python

CopyEdit

├── Sentiment-emotion.zip # Dataset and preprocessing scripts

├── biLSTM.ipynb # Main notebook for training and evaluation

├── models/ # Directory for saving trained models

├── results/ # Model evaluation results (graphs, confusion matrix)

└── README.txt # This file

**7. Model Evaluation**

Once training is completed, evaluation results can be found in the results/ directory. You can also visualize the model’s performance using the confusion matrix and other evaluation metrics within the notebook.

**8. References**

The **original dataset** was downloaded from **Kaggle**:
🔗 [**https://www.kaggle.com/datasets/kushagra3204/sentiment-and-emotion-analysis-dataset**](https://www.kaggle.com/datasets/kushagra3204/sentiment-and-emotion-analysis-dataset)
